# Supplementary material for: Butyrate Improves Skin/Lung Fibrosis and Intestinal Dysbiosis in Bleomycin-Induced Mouse Models
Source: MDPI journal article supplement (doi:10.3390/ijms22052765), 2021-03-09
Supplement: s1 [file s1]

## Supplementary Materials

**Table S1.** Primer sequences for quantitative real-time PCR.

| Species | Gene symbol  | Direction | Sequence                       |
|---------|--------------|-----------|--------------------------------|
| Mouse   | <i>Ccl2</i>  | Reverse   | 5'- CCAGCCTACTCATTGGGAT -3'    |
|         |              | Forward   | 5'- GGGCCTGCTGTTACAGTT -3'     |
| Mouse   | <i>Gapdh</i> | Reverse   | 5'- ACCCAGAAGACTGTGGATGG -3'   |
|         |              | Forward   | 5'- ACACATTGGGGGTAGGAACA -3'   |
| Human   | <i>IL6</i>   | Reverse   | 5'- CCTCAGACATCTCCAGTCCT -3'   |
|         |              | Forward   | 5'- AATGACGACCTAAGCTGCAC -3'   |
| Human   | <i>IL1b</i>  | Reverse   | 5'- TACCTGTCCTGCGTGTTGAA -3'   |
|         |              | Forward   | 5'- TCTTTGGGTAATTTTGGGATCT -3' |
| Human   | <i>GAPDH</i> | Reverse   | 5'- AGTCAGCCGCATCTTCTTTT -3'   |
|         |              | Forward   | 5'- CCAATACGACCAAATCCGTT -3'   |

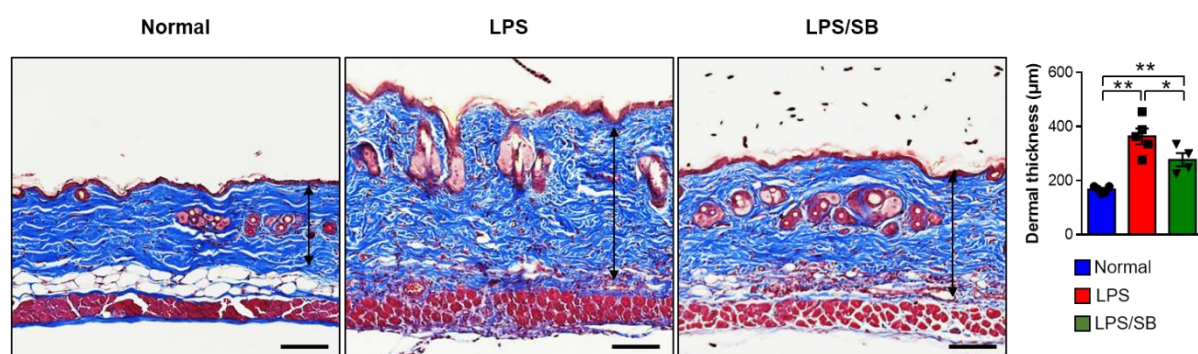

**Figure S1.** Antifibrotic effect of butyrate in LPS-induced skin fibrosis mouse model. Lipopolysaccharide (LPS) was injected subcutaneously on the back skin of mice five times a week for two weeks (5  $\mu\text{g}/\text{mouse}$ ). SB was orally gavaged from two weeks before LPS injection. Skin tissues were then obtained in normal and LPS  $\pm$  SB mice to evaluate skin fibrosis. Representative images of Masson's trichrome stain and dermal thickness in skin tissues from normal and LPS  $\pm$  SB mice.  $n = 4-5/\text{group}$ . Scale bars = 100  $\mu\text{m}$ . \* $p < 0.05$ , \*\* $p < 0.01$ .

Uncropped images of the western blot analyses are presented in Figure S2–S4.

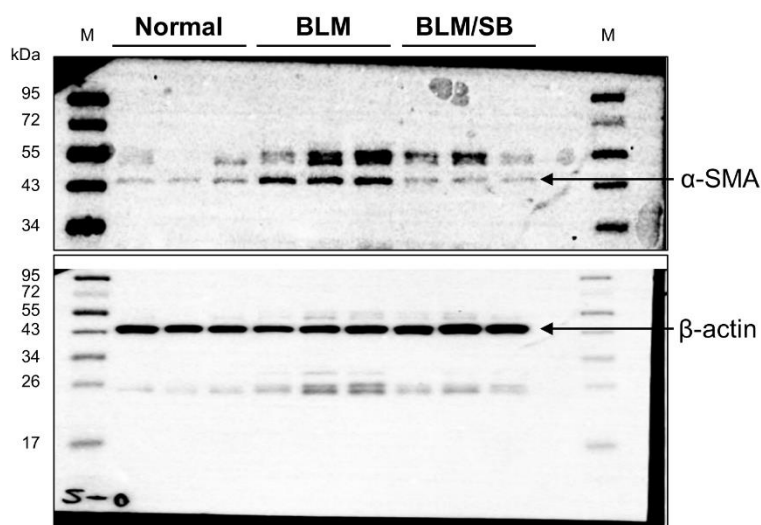

**Figure S2.** Western blot analysis of  $\alpha$ -SMA in skin tissues. BLM was injected subcutaneously on the back skin of mice five times a week for two weeks. SB was orally gavaged from two weeks before BLM injection. Skin tissues were then obtained in normal and BLM  $\pm$  SB mice. After extracting proteins from skin tissues, western blot was performed to analyze  $\alpha$ -SMA protein expression.  $\beta$ -actin was used as a loading control. M: Size marker.

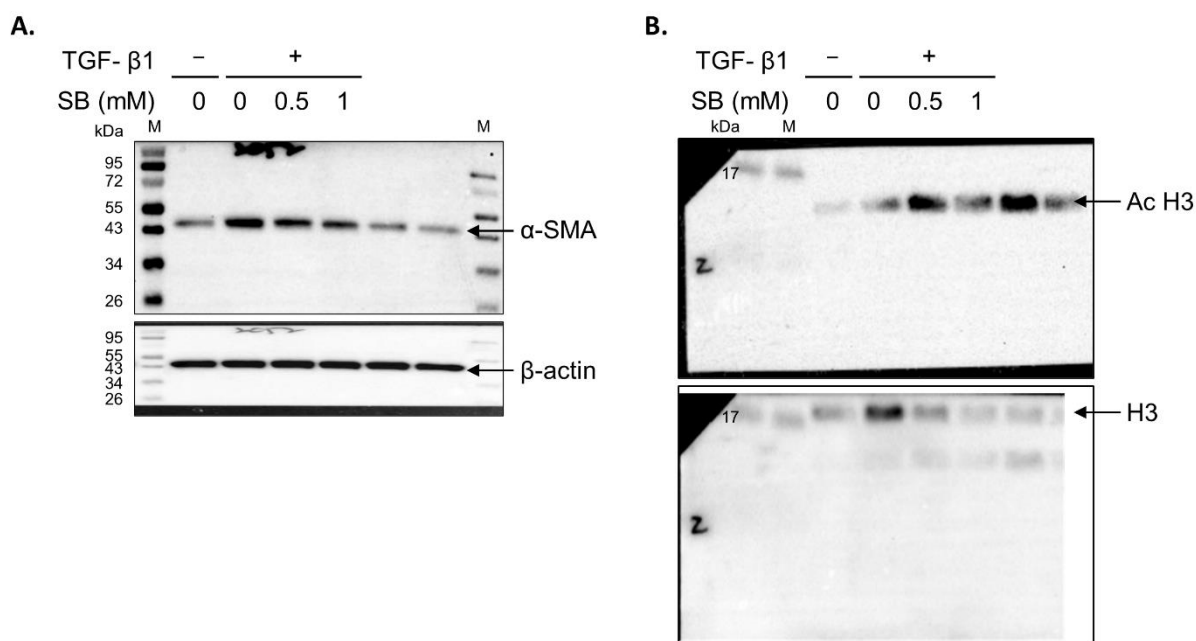

**Figure S3.** Western blot analysis of  $\alpha$ -SMA and Ac H3 in HDFs. Primary HDFs were stimulated with TGF- $\beta$ 1 (10 ng/mL) with or without SB (0.5–1 mM) for 48 h. Western blot was performed to analyze  $\alpha$ -SMA (A) and Ac-H3 protein expression (B).  $\beta$ -actin and H3 were used as a loading control for  $\alpha$ -SMA and Ac-H3, respectively. M: Size marker.

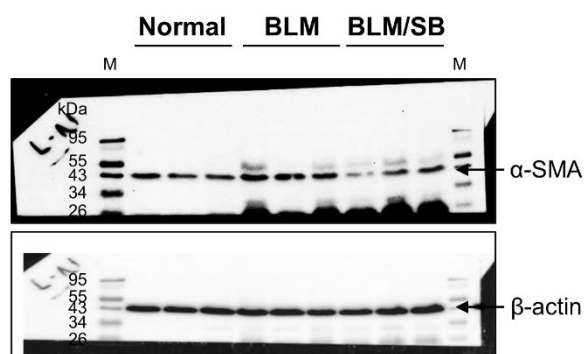

**Figure S4.** Western blot analysis of  $\alpha$ -SMA and  $\beta$ -actin in lung tissues. BLM was injected subcutaneously on the back skin of mice five times a week for two weeks. SB was orally gavaged from two weeks before BLM injection. Lung tissues were then obtained in normal and BLM  $\pm$  SB mice. After extracting proteins from lung tissues, western blot was performed to analyze  $\alpha$ -SMA protein expression.  $\beta$ -actin was used as a loading control. M: Size marker.
